# Supplementary material for: Structural Basis for the Aminoacid Composition of Proteins from Halophilic Archea
Source: PLoS Biol. 2009 Dec 15;7(12):e1000257. doi: 10.1371/journal.pbio.1000257 (PMC2780699; doi:10.1371/journal.pbio.1000257)
Supplement: Table S5 — Comparison of unfolding free energies (25E°C) obtained using guanidinium chloride (GuHCl) or urea. (0.01 MB PDF) [file pbio.1000257.s013.pdf]

**Table S6:** Comparison of unfolding free energies (25°C) obtained using guanidinium chloride (GuHCl) or urea.

| <i>Protein</i>      | $\Delta G^{U-F}(\text{GuHCl})$ | $\Delta G^{U-F}(\text{urea})$ |
|---------------------|--------------------------------|-------------------------------|
| Wild type ProtL     | 4.40 ± 0.1                     | 4.30 ± 0.3                    |
| Kx1Q ProtL          | 4.40 ± 0.2                     | 4.30 ± 0.4                    |
| Kx2Q ProtL          | 4.60 ± 0.3                     | 4.70 ± 0.7                    |
| Kx3Q ProtL          | 4.55 ± 0.2                     | 4.50 ± 0.2                    |
| Kx4Q ProtL          | 4.40 ± 0.1                     | 4.50 ± 0.8                    |
| Kx5Q ProtL          | 3.65 ± 0.1                     | 3.30 ± 0.4                    |
| Kx6Q ProtL          | 4.15 ± 0.2                     | 4.00 ± 0.2                    |
| Kx7Q ProtL          | 3.50 ± 0.2                     | 3.30 ± 0.3                    |
| Kx1E ProtL          | 4.50 ± 0.3                     | 4.50 ± 0.2                    |
| Kx2E ProtL          | 4.45 ± 0.5                     | 4.20 ± 0.3                    |
| Kx3E ProtL          | 4.50 ± 0.6                     | 4.40 ± 0.1                    |
| Kx4E ProtL          | 3.80 ± 0.2                     | 4.10 ± 0.2                    |
| Kx5E ProtL          | 0.30 ± 0.2                     | 1.20 ± 0.2                    |
| Kx6E ProtL          | 0.50 ± 0.2                     | 0.60 ± 0.1                    |
| Kx7E ProtL          | -0.40 ± 0.2                    | -0.50 ± 0.4                   |
| Wild type Hv 1ALigN | 1.80 ± 0.3                     | 1.70 ± 0.2                    |
